# Supplementary material for: Immobilization of Candida antarctica Lipase B on Silicone Nanofilaments
Source: Hindawi journal article supplement (doi:10.1155/2021/8812240), 2021-02-05
Supplement: f1 [file 8812240.f1.pdf]

## Supporting Information

### Comparison of hydrophobic and untreated material.

The untreated and hydrophobic material was compared under the SEM microscope.

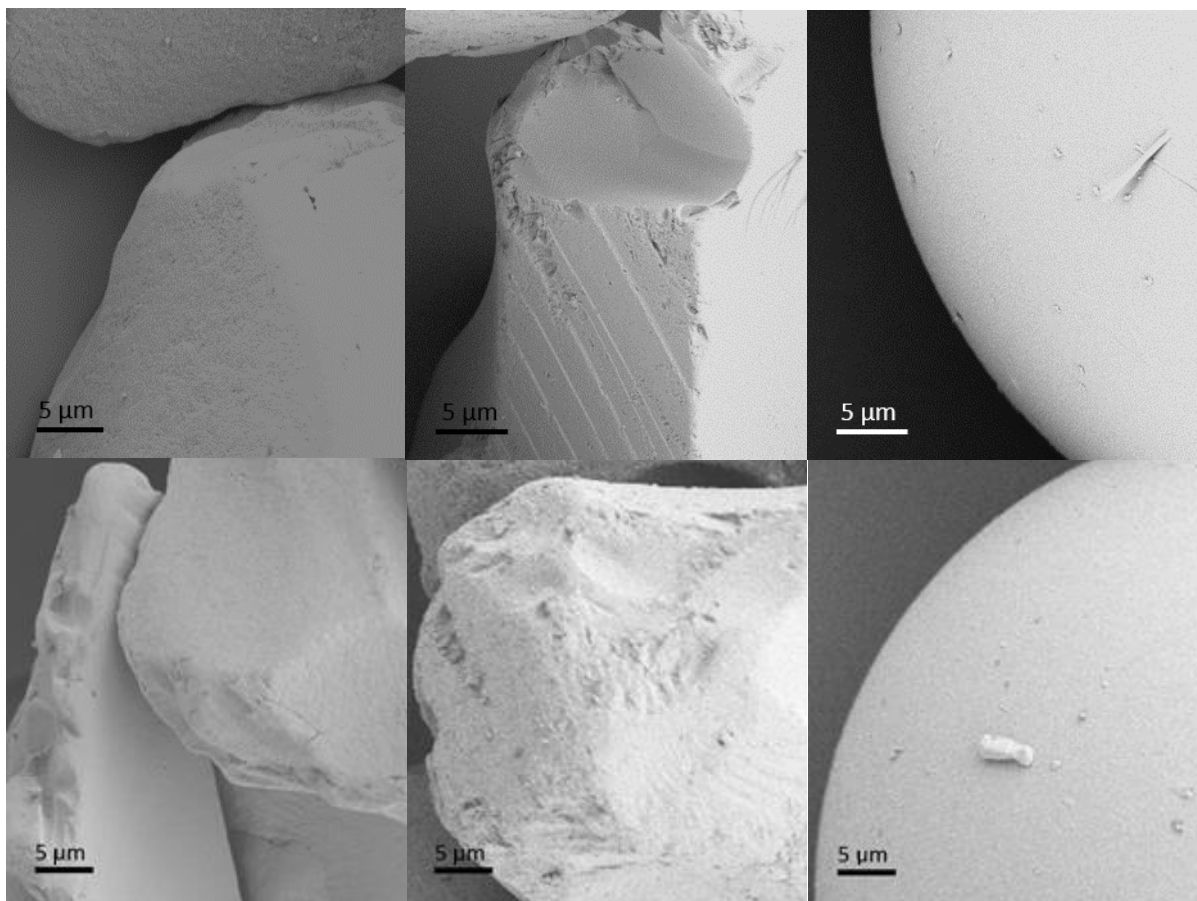

Figure 1 Top left to bottom right **150Å untreated material, 60Å untreated material, nonporous material, 150Å hydrophobic material, 60Å hydrophobic material, non-porous hydrophobic material.**

## BET measurements

| Sample                      | BET surface [m <sup>2</sup> /g]<br>(Replica Nr.) | Average [m <sup>2</sup> /g] | Error [m <sup>2</sup> /g] |
|-----------------------------|--------------------------------------------------|-----------------------------|---------------------------|
| <b>150Å hydrophobic</b>     | 207 (1)<br>194 (2)<br>197 (3)                    | 200                         | 5.9                       |
| <b>150Å SNFs</b>            | 172 (1)<br>148 (2)<br>166 (3)                    | 162                         | 10.3                      |
| <b>60Å hydrophobic</b>      | 182 (1)<br>176 (2)<br>198 (3)                    | 185                         | 8.9                       |
| <b>60Å SNFs</b>             | 133 (1)<br>140 (2)<br>126 (3)                    | 133                         | 5.7                       |
| <b>No pores hydrophobic</b> | 0.04                                             | 0.04                        | -                         |
| <b>No pores SNFs</b>        | 0.5 (1)<br>0.7 (2)                               | 0.6                         | 0.1                       |

Table 1 Measured BET values untreated materials.

## Calculation of the surface area of the nonporous control sample

| Density spheres    |          |                   | Suface per gramm |                        |                   |
|--------------------|----------|-------------------|------------------|------------------------|-------------------|
| Density water 22°C | 0.99772  | g/mL              | Diameter         | 75                     | µm                |
| Weight water       | 9.3159   | g                 | Diameter         | 0.000075               | m                 |
| Weight beads       | 1.3515   | g                 | Pi               | 3.141593               |                   |
| Combined vol.      | 10       | mL                | Surface 1 sphere | 1.77*10 <sup>-8</sup>  | m <sup>2</sup>    |
| Volume water       | 9.337189 | mL                | Volume 1 sphere  | 2.21*10 <sup>-13</sup> | m <sup>3</sup>    |
| Volume beads       | 0.662811 | mL                | Weight 1 sphere  | 4.5*10 <sup>-10</sup>  | kg                |
| Density            | 2.039042 | g/mL              | Spheres per gram | 2220196                | 1/g               |
| Density            | 2039.042 | kg/m <sup>3</sup> | Surface per gram | 0.039234               | m <sup>2</sup> /g |

Table 2 Step by step calculation of the surface area of the nonporous material

## BCR measurements of different carrier materials

| Sample                      | Immobilized CalB<br>[% w/w] (Replica Nr.)    | Average [% w/w] | Error [% w/w] |
|-----------------------------|----------------------------------------------|-----------------|---------------|
| <b>150Å hydrophobic</b>     | 3.63 (1)<br>3.87 (2)<br>4.05 (3)             | 3.85            | 0.17          |
| <b>150Å SNFs</b>            | 3.34 (1)<br>3.68 (2)<br>3.44 (3)             | 3.48            | 0.14          |
| <b>60Å hydrophobic</b>      | 3.27 (1)<br>3.47 (1)<br>3.60 (1)             | 3.45            | 0.14          |
| <b>60Å SNFs</b>             | 3.37 (1)<br>3.19 (2)<br>3.32 (3)             | 3.29            | 0.07          |
| <b>No pores hydrophobic</b> | 2.36 (1)<br>2.52 (2)<br>2.72 (3)             | 2.53            | 0.15          |
| <b>No pores SNFs</b>        | 2.61 (1)<br>2.32 (2)<br>2.83 (3)<br>2.78 (4) | 2.64            | 0.20          |

Table 3 Measured immobilizations of CalB on different carrier materials.

## Activity measurements of different carrier materials

| Sample                          | Activity [U]<br>(Replica Nr)               | Catalyst used<br>[mg]    | Average [U] | Error [U] |
|---------------------------------|--------------------------------------------|--------------------------|-------------|-----------|
| <b>150Å hydrophobic</b>         | 673 (1)<br>972 (2)<br>827 (3)              | 2.7<br>2.6<br>2.5        | 824         | 122       |
| <b>150Å SNFs</b>                | 1157 (1)<br>1565 (2)<br>1465 (3)           | 2.9<br>2.7<br>2.9        | 1395        | 173       |
| <b>60Å hydrophobic</b>          | 856 (1)<br>788 (1)<br>1085 (1)<br>964 (1)  | 2.8<br>2.8<br>2.8<br>2.8 | 923         | 112       |
| <b>60Å SNFs</b>                 | 1931 (1)<br>1820 (2)<br>1725 (3)           | 3<br>3.1<br>3            | 1825        | 84        |
| <b>No pores<br/>hydrophobic</b> | 286 (1)<br>190 (2)<br>330 (3)              | 11<br>4<br>3.7           | 269         | 58        |
| <b>No pores SNFs</b>            | 2145 (1)<br>2170 (2)<br>1828(3)<br>2019(4) | 3.6<br>3.1<br>3.7<br>3.6 | 2040        | 135       |

Table 4 Activities and catalyst amount used.

### Variation of the enzyme loading BRC assay

| Sample               | Immobilized CalB<br>[% w/w]<br>(Replica Nr.)                         | Average [% w/w] | Error [% w/w] |
|----------------------|----------------------------------------------------------------------|-----------------|---------------|
| no pores SNFs (8 mg) | 2.61 (1)<br>2.32 (2)<br>2.83 (3)<br>2.78 (4)                         | 2.64            | 0.20          |
| no pores SNFs (4 mg) | 1.07 (1)<br>1.22 (1)<br>1.19 (1)<br>1.49 (2)<br>1.29 (2)<br>1.20 (2) | 1.24            | 0.13          |
| no pores SNFs (2 mg) | 0.69 (1)<br>0.64 (2)<br>0.67 (3)                                     | 0.66            | 0.02          |
| no pores SNFs (1 mg) | 0.30 (1)<br>0.39 (2)<br>0.33 (2)<br>0.25 (2)                         | 0.31            | 0.06          |

Table 5 Measured immobilizations of CalB.

### Variation of the enzyme loading activity assay

| Sample                  | Activity [U]                                 | Catalyst used<br>[mg]    | Average [U] | Error [U] |
|-------------------------|----------------------------------------------|--------------------------|-------------|-----------|
| no pores SNFs<br>(8 mg) | 2145 (1)<br>2169 (2)<br>1827 (3)<br>2018 (4) | 3.6<br>3.1<br>3.7<br>3.6 | 2040        | 136       |
| no pores SNFs<br>(4 mg) | 2549 (1)<br>2472 (1)<br>2171 (2)<br>2374 (2) | 3.7<br>3.5<br>3.5<br>3   | 2391        | 142       |
| no pores SNFs<br>(2 mg) | 2939 (1)<br>3439 (2)<br>3008 (3)             | 3.3<br>7.6<br>9.6        | 3129        | 221       |
| no pores SNFs<br>(1mg)  | 2308 (1)<br>2504 (1)<br>2567 (2)             | 8.6<br>8.6<br>7.8        | 2486        | 98        |

Table 6 Activities and catalyst amount used.

### 39 Approximation of the CalB layers over the BET surface

| Sample              | Enzyme per silica [g/g] | mol enzyme/g silica [mol/g] | enzymes/g silica [1/g] | Surface all enzymes on 1g Silica [m <sup>2</sup> /g] | BET surface silica [m <sup>2</sup> /g] | Layers of BET surface covered by enzyme |
|---------------------|-------------------------|-----------------------------|------------------------|------------------------------------------------------|----------------------------------------|-----------------------------------------|
| no pores SNFs (8mg) | 0.0264                  | $7.89 \times 10^7$          | $4.75 \times 10^{17}$  | 9.50                                                 | 0.6                                    | 15.84                                   |
| no pores SNFs (4mg) | 0.0124                  | $3.72 \times 10^7$          | $2.24 \times 10^{17}$  | 4.47                                                 | 0.6                                    | 7.46                                    |
| no pores SNFs (2mg) | 0.0066                  | $1.99 \times 10^7$          | $1.20 \times 10^{17}$  | 2.40                                                 | 0.6                                    | 3.99                                    |
| no pores SNFs (1mg) | 0.003                   | $9.40 \times 10^8$          | $5.66 \times 10^{16}$  | 1.13                                                 | 0.6                                    | 1.89                                    |
| Novozyme            | 0.2                     | $5.99 \times 10^6$          | $3.61 \times 10^{18}$  | 72.1                                                 | 150                                    | 0.48                                    |

Table 7 detailed calculation of the layers over the entire BET surface. CalB area assumed to be 40Å x50Å.  
Molecular weight of CalB 33.4 kDa.

### 42 Activity of Novozyme

| Sample       | Activity [U]                 | Catalyst used [mg]     | Average [U] | Error [U] |
|--------------|------------------------------|------------------------|-------------|-----------|
| Novozyme 435 | 3381<br>2706<br>2932<br>3274 | 3<br>3.5<br>3.2<br>3.1 | 3073        | 269       |

Table 8 Activities and catalyst amount used for comparison measurements with Novozyme 435.
